# Supplementary material for: Tight inclusion complexation of 2,7-dimethyldiazapyrenium in cucurbit[7]uril
Source: Royal Society of Chemistry journal article supplement (doi:10.1039/b418017h), 2005-01-01
Supplement: b418017h.pdf [file b418017h.pdf]

## Tight inclusion complexation of 2,7-dimethyldiazapyrenium in cucurbit[7]uril

Vladimir Sindelar, Mabel A. Cejas, Francisco M. Raymo and Angel E. Kaifer\*

Center for Supramolecular Science and Department of Chemistry, University of Miami, Coral Gables, FL 33124-0431. E-mail: akaifer@miami.edu

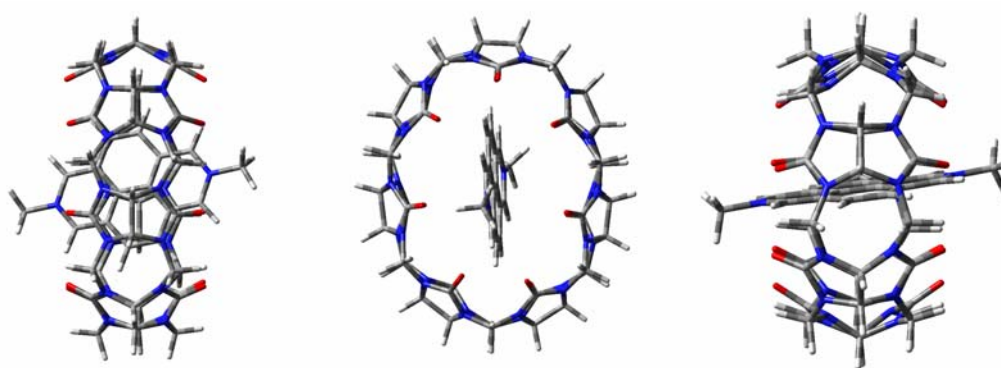

**Figure S11.** Views of the energy-minimized structure of the CB7•Me<sub>2</sub>DAP<sup>2+</sup> complex (AM1).

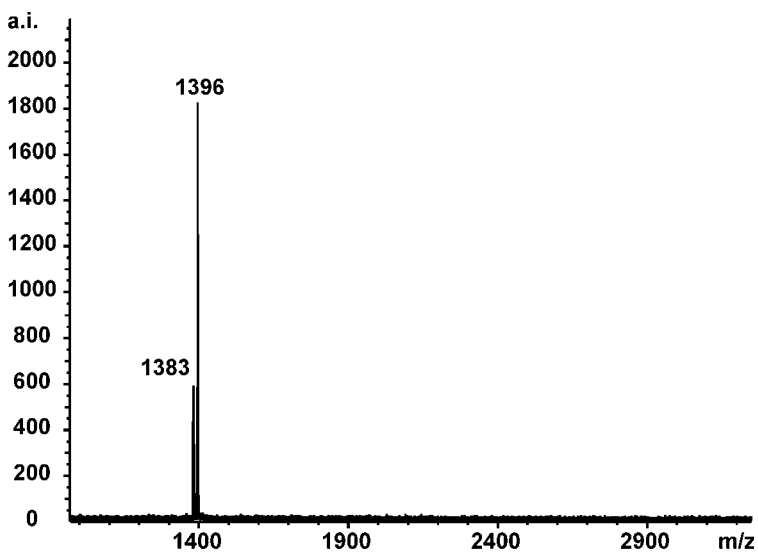

**Figure S12.** MALDI-TOF MS spectra of CB7•Me<sub>2</sub>DAP<sup>2+</sup> complex recorded from  $\alpha$ -cyano-4-hydroxycinnamic acid solid matrix.

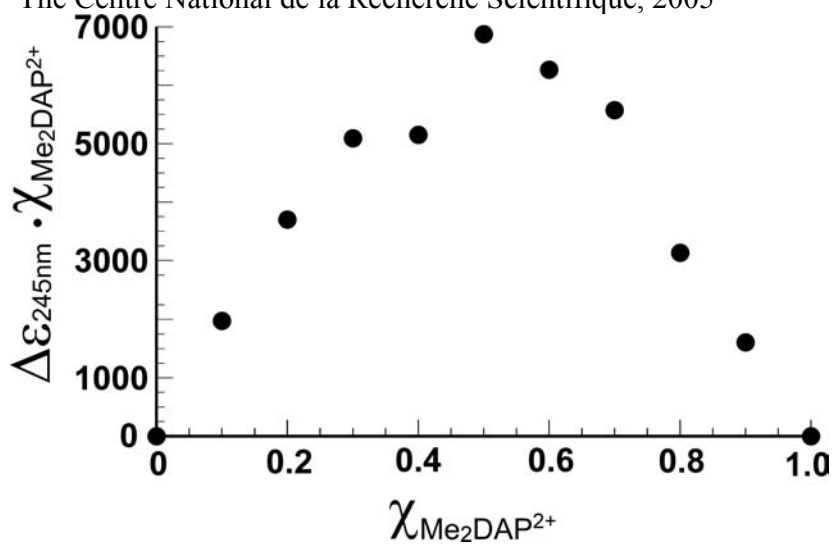

**Figure S13.** Job plot for  $\text{CB7} \cdot \text{Me}_2\text{DAP}^{2+}$  complex ( $[\text{CB7}] + [\text{Me}_2\text{DAP}^{2+}] = 12 \mu\text{M}$ ) in sodium phosphate buffer pH = 7.0 also containing 0.1 M NaCl.
